# Supplementary material
Source: Research Square preprint supplement (doi:10.21203/rs.3.rs-9193430/v1)
Supplement: Supplementary file 1 [file 3c580d27ac3d399b09f5d826.xlsx]

## Sheet: Extended Data Table
Extended Data Table 1. Clinical signs, tissue viral titers and antiviral resistance profiling in A/H5N1-infected IS hamsters.
Treatment	Hamster ID	Days post-infection	Clinical signs		Virus isolation						NAI assay		ddPCR (Mut 275Y)		ddPCR (Mut 38T)		Sanger sequencing (day 14 p.i.)
			Weight loss (%)a	Other severe signs b	Lungs	TCID50/g	NT	TCID50/g	Brain	TCID50/g	IC50(nM)	Fold-change vs WT	%	Mean %	%	Mean %	Gene	Resistance-associated substitutions
Placebo	1	4	14.6	13% weight loss, found death	Yes	6.95	Yes	7.7	Yes	5.2	7.069	0.797946	0.02	0.03	0	0.01625	NA PA PB1/PB2c	-
	2	6		None	Yes	5.2	Yes	6.2	Yes	5.45	NAct	-	0.05		0.05
	3			None	Yes	4.2	Yes	5.7	Yes	2.95	NAct	-	0.05		0.04
	4			None	Yes	5.45	Yes	5.95	No	1.5	4.989	0.563156	0.03		0.02
	5			Lethargy, neurological	Yes	5.2	Yes	6.45	Yes	5.2	5.45	0.615194	0.02		0.02
	6	12		≥20% weight loss, lethargy	Yes	4.45	Yes	4.95	Yes	5.7	7.846	0.885653	0.07		0			No substitutions in NA, PA and PB1
	7	14		None	Yes	4.7	Yes	5.2	No	1.5	NAct	-	0		0			No substitutions in NA and PA
	8			None	Yes	3.7	Yes	3.7	No	1.5	NAct	-	0		0			No substitutions in NA and PA
Oseltamivir	9	5	13.5	≥20% weight loss	Yes	6.7	Yes	7.95	Yes	5.95	8.859	1.76018	0.04	0.0175	-	-	NA	-
	10	6		Lethargy, respiratory distress	Yes	5.45	Yes	6.2	Yes	4.45	6.774	1.34592	0.01		-	-
	11			None	Yes	4.2	Yes	6.2	Yes	5.7	5.361	1.06517	0.02		-	-
	12			Lethargy, neurological	Yes	5.45	Yes	7.2	Yes	5.45	4.394	0.873038	0.03		-	-
	13			Lethargy	Yes	5.2	Yes	6.45	Yes	3.7	6.349	1.26147	0.02		-	-
	14	14		None	Yes	5.7	Yes	2.95	Yes	4.45	5.408	1.07451	0.02		-	-		No substitutions
	15			None	Yes	4.2	Yes	3.7	Yes	2.5	4.925	0.978542	0		-	-		No substitutions
	16			None	Yes	4.2	Yes	4.2	Yes	2.5	5.102	1.01371	0		-	-		No substitutions
Baloxavir	17	6	10.2	None	Yes	4.2	Yes	4.95	No	1.5	-	-	-	-	0.07	0.06	PA	-
	18			None	Yes	3.2	Yes	4.45	No	1.5	-	-	-	-	0.05
	19			None	No	1.5	Yes	3.95	No	1.5	-	-	-	-	ND
	20			None	No	1.5	Yes	4.95	No	1.5	-	-	-	-	ND
	21	14		None	No	1.5	No	1.5	No	1.5	-	-	-	-	ND			ND
	22			None	No	1.5	No	1.5	No	1.5	-	-	-	-	ND			ND
	23			None	No	1.5	No	2	No	1.5	-	-	-	-	ND			ND
	24			None	No	2	Yes	3.7	No	1.5	-	-	-	-	ND			ND
Molnupiravir (50 mg/kg)	25	4	18.9	≥20% weight loss, lethargy	Yes	5.2	Yes	5.7	Yes	2	-	-	-	-	-	-	PB1/PB2	-
	26	6		None	Yes	5.2	Yes	6.2	Yes	6.45	-	-	-	-	-	-
	27			None	Yes	4.95	Yes	6.2	Yes	2.5	-	-	-	-	-	-
	28			Neurological	Yes	5.2	Yes	3.7	Yes	2	-	-	-	-	-	-
	29			None	Yes	4.2	Yes	6.7	Yes	4.95	-	-	-	-	-	-
	30	9		None	Yes	5.2	Yes	6.95	Yes	5.2	-	-	-	-	-	-
	31	14		None	Yes	4.2	Yes	3.95	No	1.5	-	-	-	-	-	-		Not amplified c
	32			Neurological	No	2	Yes	2.5	Yes	5.95	-	-	-	-	-	-		No substitutions
Molnupiravir (200 mg/kg)	33	6	4.8	None	Yes	7.2	Yes	5.45	No	1.5	-	-	-	-	-	-	PB1/PB2	-
	34			None	No	1.5	Yes	4.95	No	1.5	-	-	-	-	-	-
	35			None	Yes	5.45	Yes	5.2	Yes	6.7	-	-	-	-	-	-
	36			None	No	2	Yes	4.7	No	1.5	-	-	-	-	-	-
	37	14		None	No	1.5	No	1.5	No	1.5	-	-	-	-	-	-		ND
	38			None	No	1.5	Yes	2.825	No	1.5	-	-	-	-	-	-		ND
	39			None	No	1.5	Yes	4.7	No	1.5	-	-	-	-	-	-		ND
	40			None	No	1.5	Yes	4.95	No	1.5	-	-	-	-	-	-		ND
Oseltamivir + Molnupiravir (50 mg/kg)	41	6	3.1	None	Yes	2.95	Yes	5.95	No	1.5	7.799	1.54957	0	0.02	-	-	NA PB1/PB2c	-
	42			None	No	1.5	Yes	4.2	No	1.5	ND	-	ND		-	-
	43			None	Yes	5.45	Yes	6.45	Yes	5.7	9.123	1.81264	0.05		-	-
	44			None	Yes	5.7	Yes	7.2	Yes	6.2	8.878	1.76396	0.03		-	-
	45	9		18.4% weight loss, neurological	Yes	2.95	Yes	4.2	Yes	6.2	10.34	2.05444	0		-	-		No substitutions in NA
	46	14		None	No	1.5	No	1.5	No	1.5	ND	-	ND		-	-		ND
	47			None	No	1.5	Yes	2.5	No	1.5	ND	-	ND		-	-		ND
	48			None	No	1.5	Yes	4.2	No	1.5	ND	-	ND		-	-		ND
Stock A/British_Columbia/2032/2024 (H5N1)											5.033	1	0.05		0.08		NA/PA PB1/PB2	No substitutions
Wild-Type control: A/California/04/2009 (H1N1)pdm09 - H275											0.14	0.0278164
Mutant control: A/California/04/2009 (H1N1)pdm09 - 275Y											333.7	2383.57
a: Percentage mean maximum weight loss from baseline (67-102 gr)
b: Neurological signs include abnormal gait, cervical rigidity, and hindlimb paralysis
c: Not amplified (no PCR product obtained; sequencing not performed)
- : Not applicable
IC50: 50% inhibitory concentration
NAct: no detectable neuraminidase activity (activity below the assay threshold; <10-fold above the MUNANA substrate baseline)
ND: not determined (no detectable virus in lungs or brain)
p.i.: post-infection
